# Supplementary material for: Immobilized laccase of Galactomyces geotrichum on modified bentonite and its use in the bioremediation of olive mill wastewater
Source: Royal Society of Chemistry journal article supplement (doi:10.1039/d4re00470a), 2025-01-01
Supplement: d4re00470a1.pdf [file d4re00470a1.pdf]

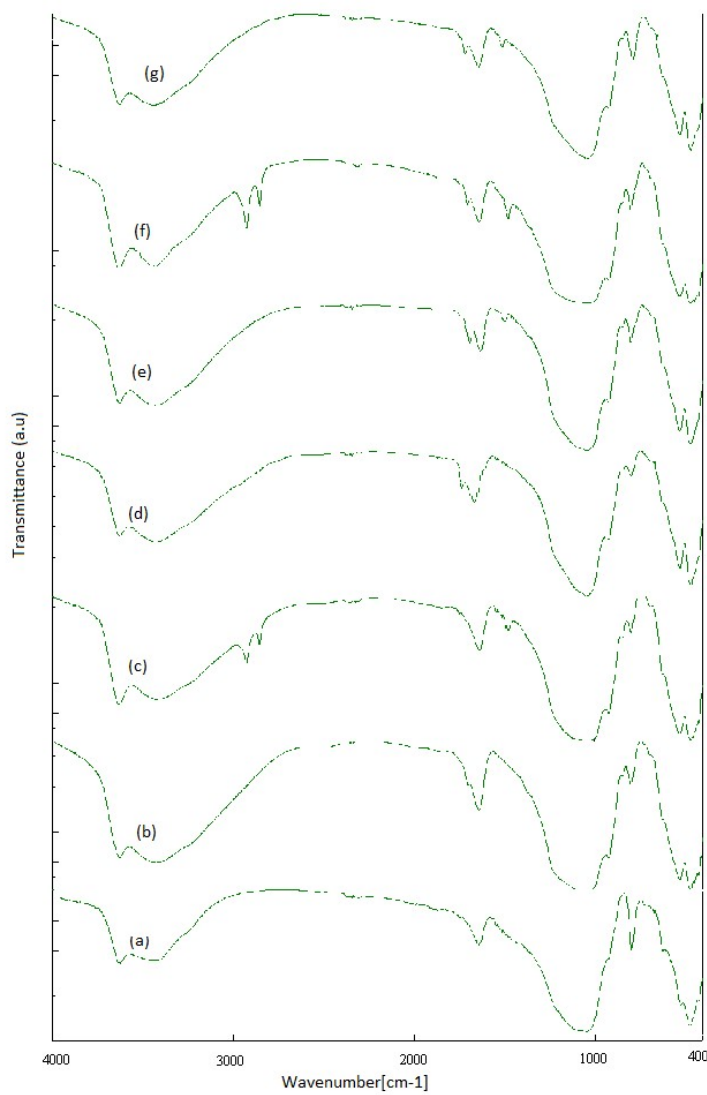

FTIR spectra of (a) Raw bent, (b) ABT-bent, (c) CTAB-bent, (d) GDU-bent, (e) ABT-bent-lac, (f) CTAB-bent-lac, (g) GDU-bent-lac

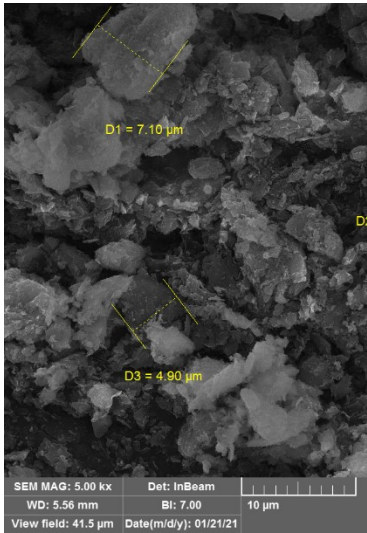

(a)

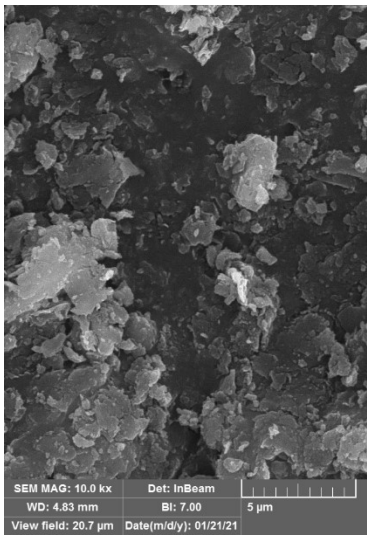

(b)

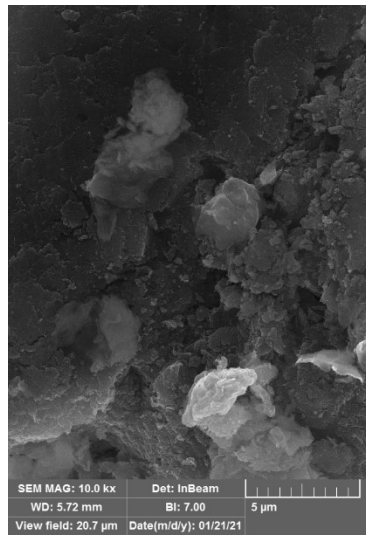

(c)

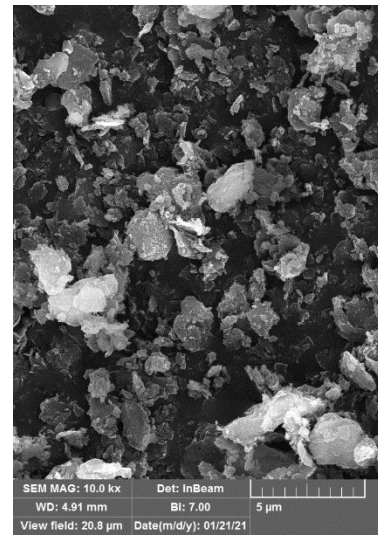

(d)

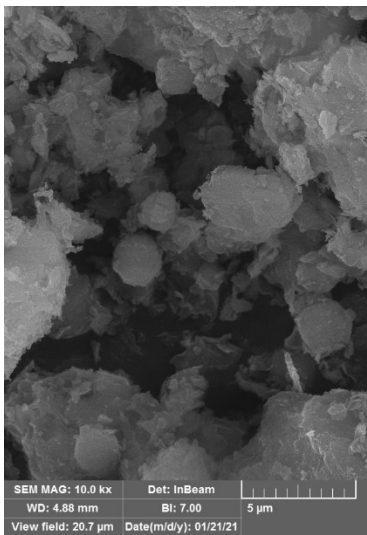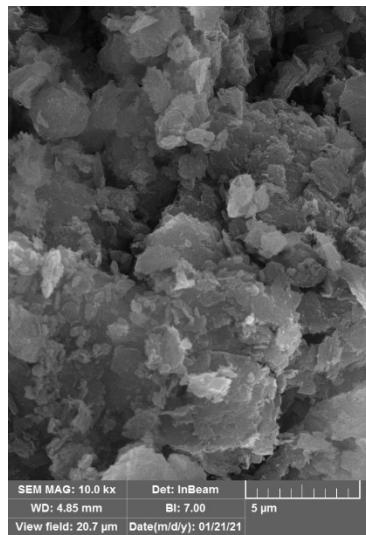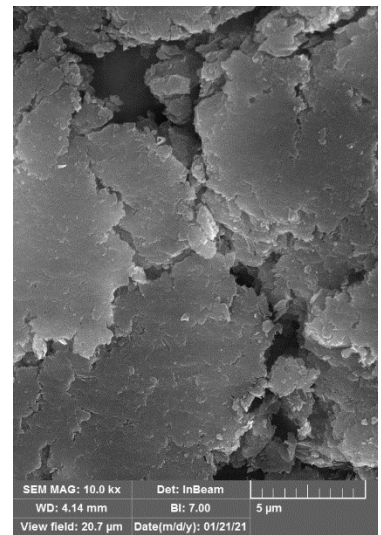

(e)

(f)

(g)

Scanning electron microscopy of a) raw bentonite, b) ABT-bent, c) CTAB-bent, d) GDU-bent, e) ABT-bent-lac, f) CTAB-bent-lac, g) GDU-bent-lac

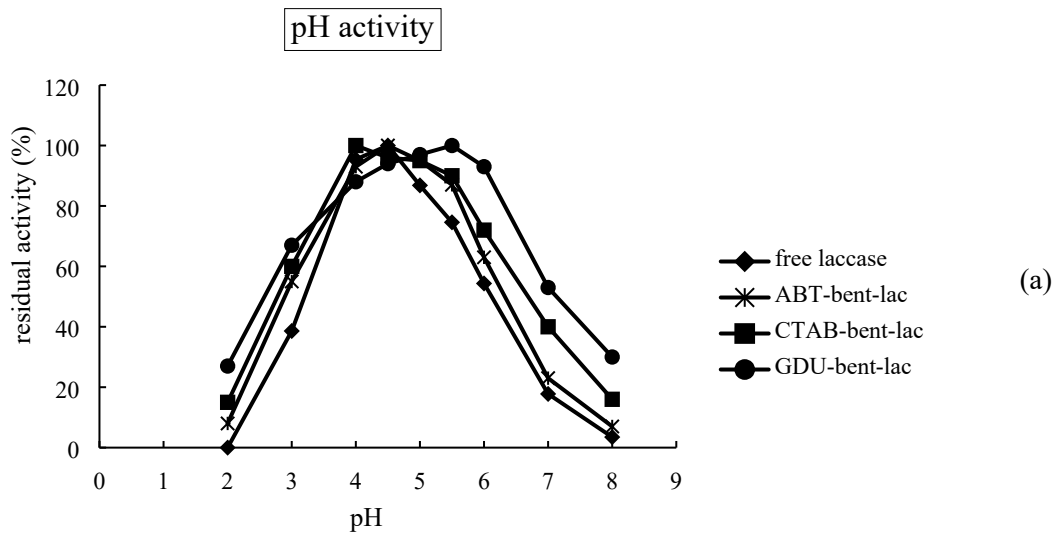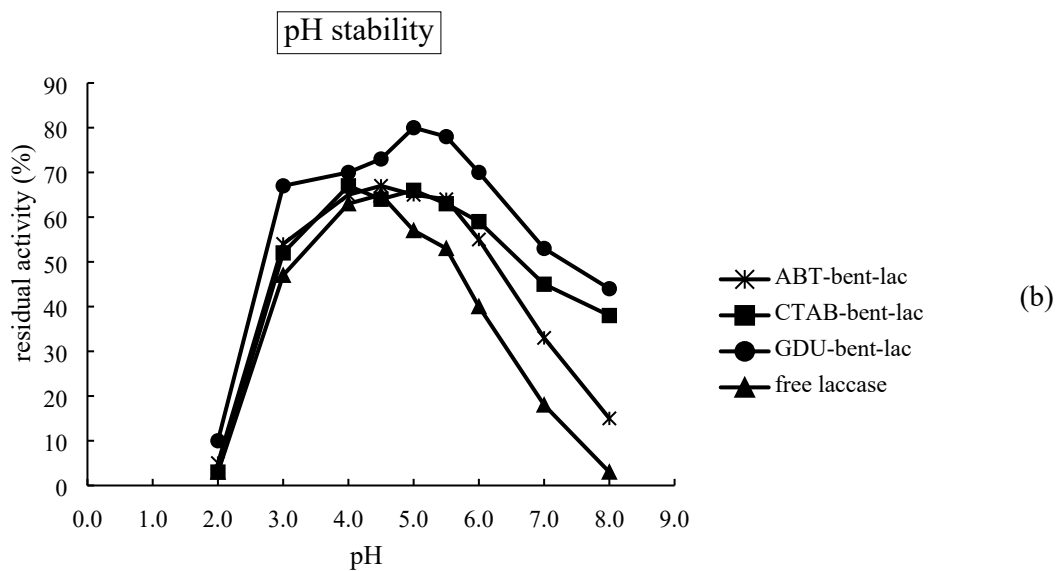

Effect of pH on: (a) activity and (b) stability of free and immobilized laccase

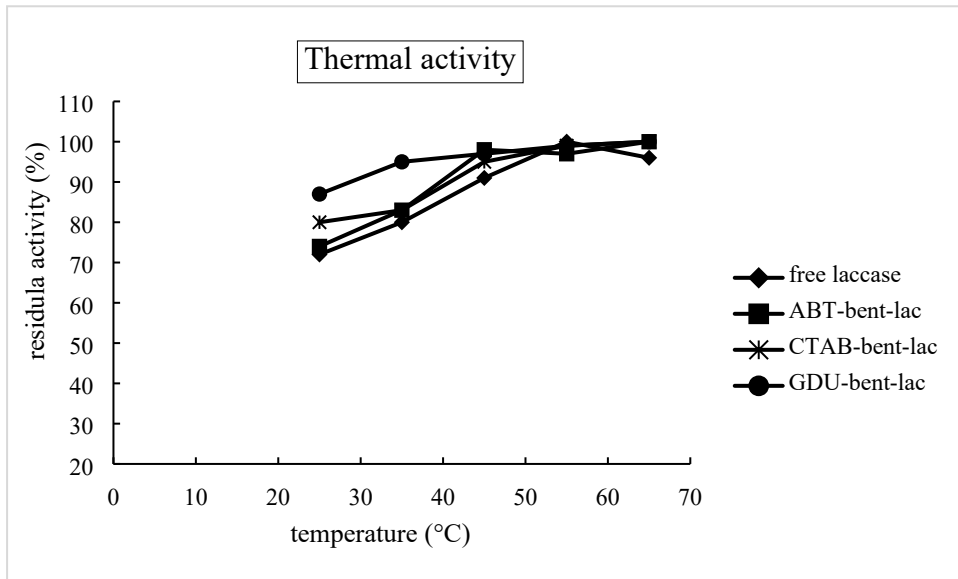

(a)

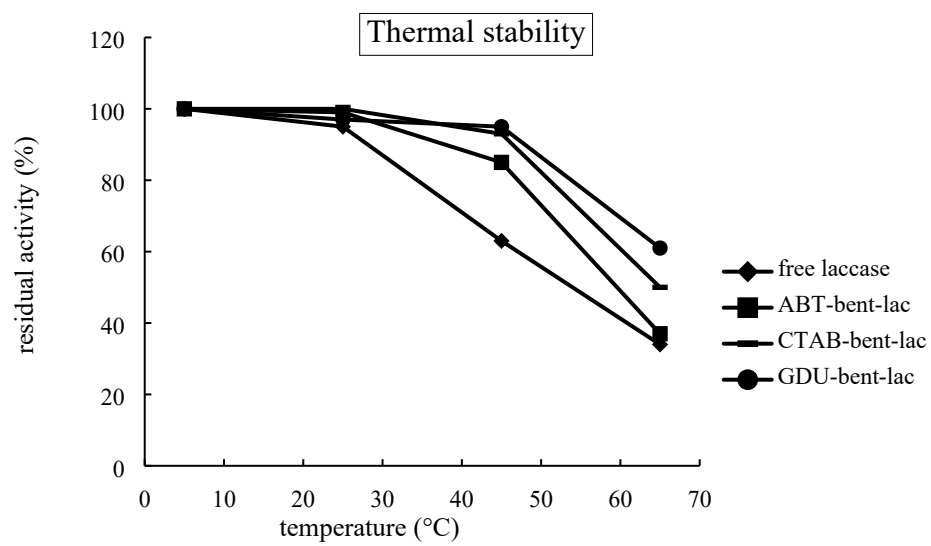

(b)

Effect of temperature on: (a) activity and (b) stability of free and immobilized laccase

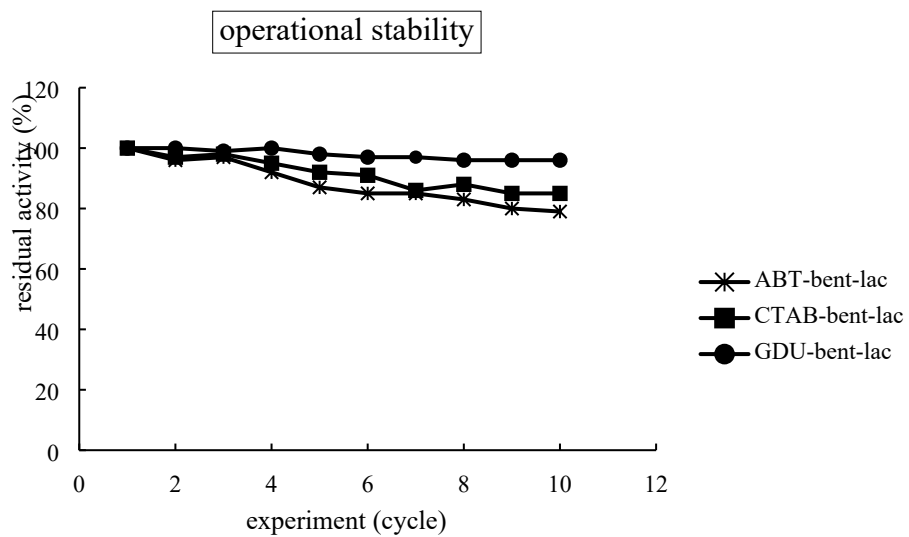

Recycling effect on immobilized laccase activity

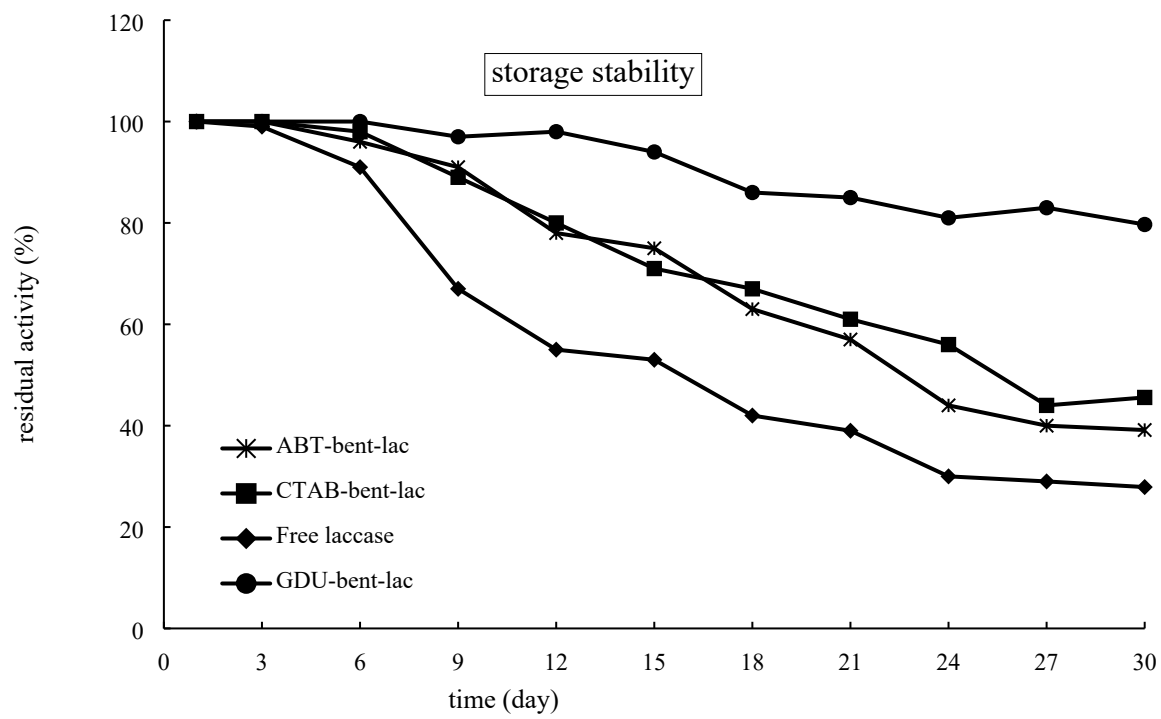

Storage stability of free and immobilized laccase

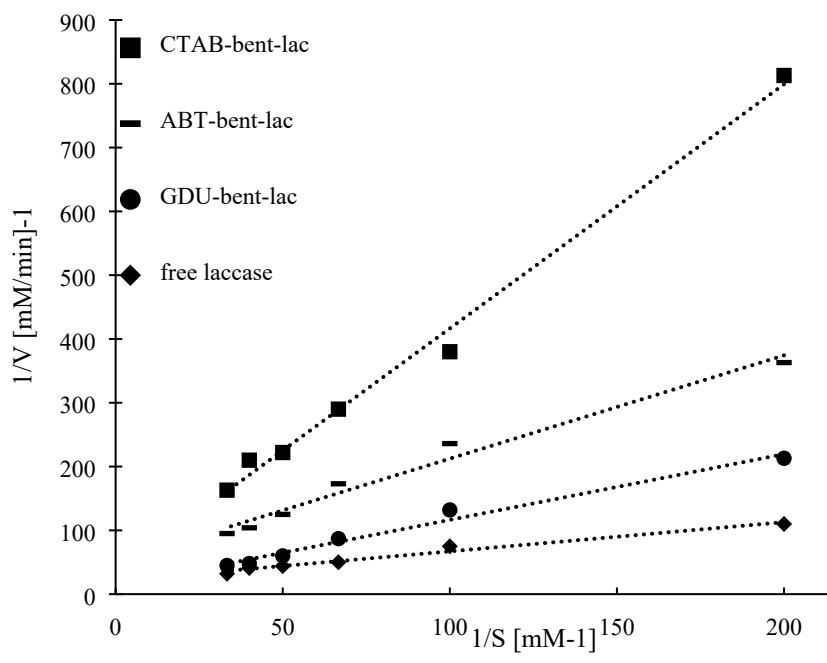

Lineweaver-Burk plot of the free laccase and the immobilized laccase on CTAB-bent, ABT-bent and GDU-bent. Reaction were carried out in pH 4.8 and room temperature.

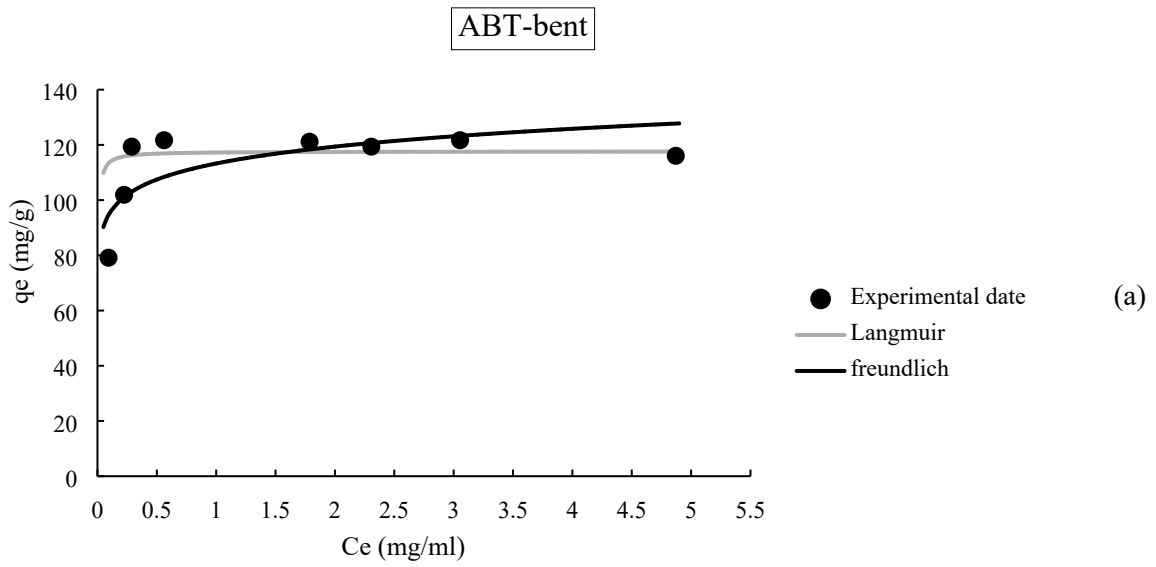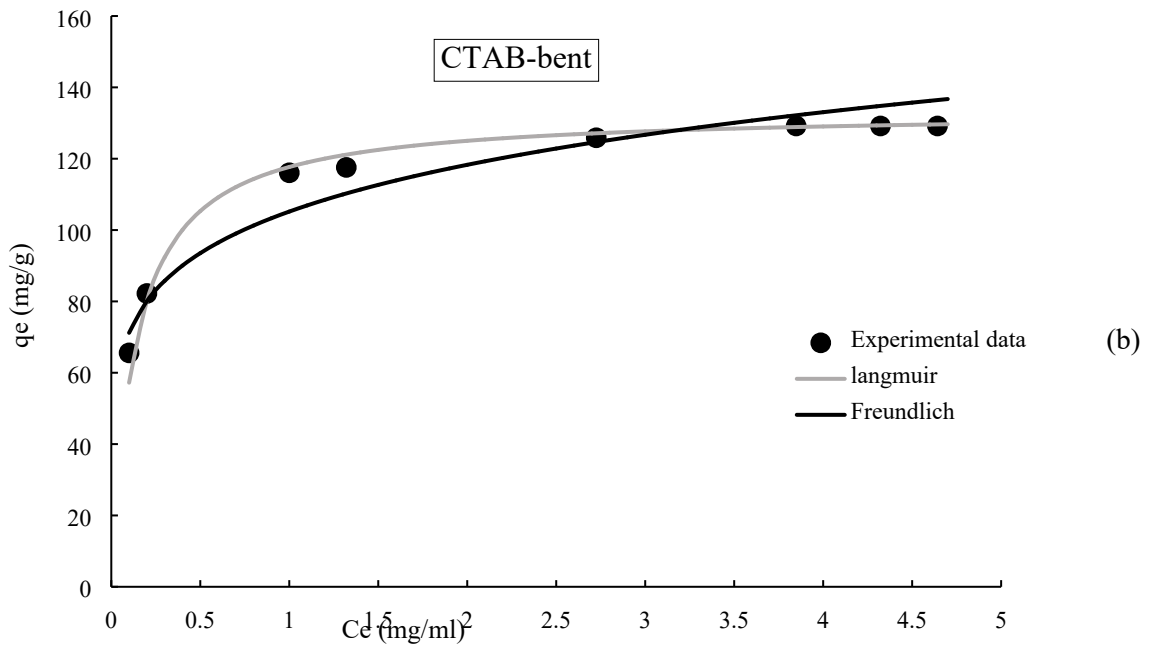

Adsorption isotherms of proteins onto (a) ABT-bent and (b) CTAB-bent at room temperature



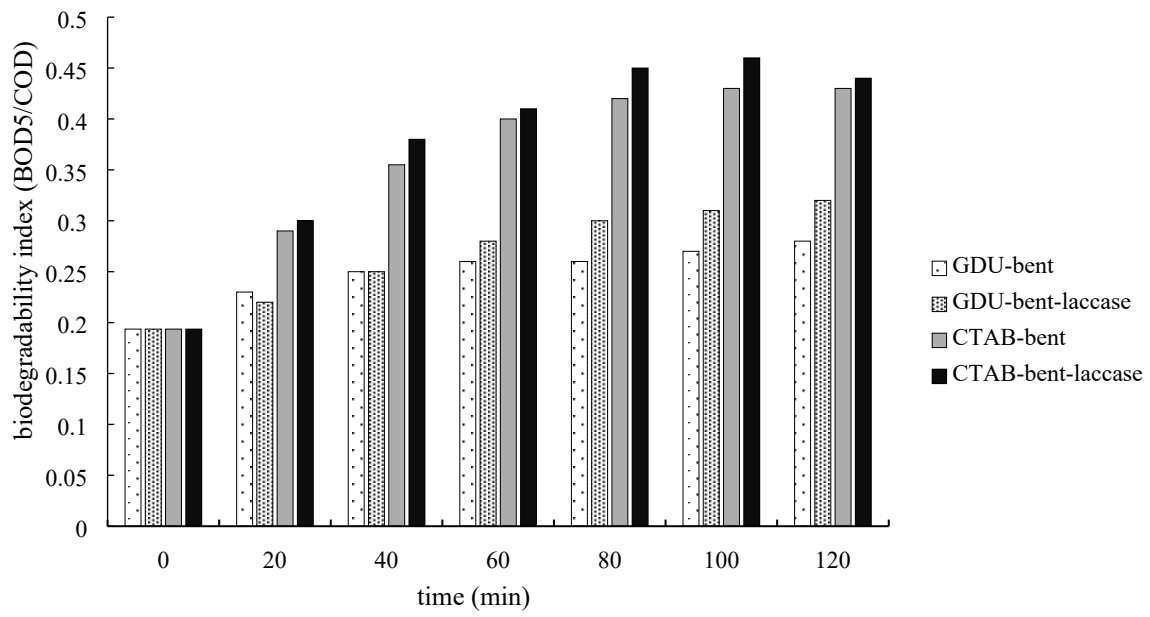

changes in biodegradability index of OMW

**Table 1**

characteristics of raw OMW used in this study

| parameter                       | Unit   | Average value |
|---------------------------------|--------|---------------|
| pH                              | --     | 5.05          |
| Water content                   | (%)    | 91            |
| Total phenolic content          | mg L-1 | ≈ 1500        |
| Oil and Grease (O & G)          | mg L-1 | 13000         |
| Turbidity                       |        | 21300         |
| Total Suspended Solid (TSS)     | mg L-1 | 82888         |
| Volatile Organic Compound (VOC) | mg L-1 | 58021         |
| BOD <sub>5</sub>                | mg L-1 | 35000         |
| COD                             | mg L-1 | 180720        |

**Table 2** characteristics of the raw bentonite

| Chemical analysis (%)          |       | Physical analysis |                    |         |
|--------------------------------|-------|-------------------|--------------------|---------|
|                                |       |                   | Unit               |         |
| SiO <sub>2</sub>               | 69.8  |                   |                    |         |
| Al <sub>2</sub> O <sub>3</sub> | 11.88 | Water absorption  | %                  | 300-700 |
| Fe <sub>2</sub> O <sub>3</sub> | 1.4   | Inflation         | ml/gr <sup>2</sup> | 22-25   |
| Al(OH) <sub>3</sub>            | 1.07  |                   |                    |         |
| CaO                            | 0.96  | Humidity          | %                  | 4-8     |
| Na <sub>2</sub> O              | 1.03  | Montmorillonite   | %                  | 86<     |
| MgO                            | 1.42  | Grading           | Mesh               | 400     |
| K <sub>2</sub> O               | 0.47  | CEC               | mEq/100gr          | 100-110 |
| TiO <sub>2</sub>               | 0.1   |                   |                    |         |

**Table 3.** Textural characteristics of bentonites and immobilized 1 laccases

| Sample        | Surface area<br>(m <sup>2</sup> /g) | Total pore<br>Volume (C <sup>3</sup> /g) | Mean pore<br>diameter (nm) | BJH (nm) |
|---------------|-------------------------------------|------------------------------------------|----------------------------|----------|
| Raw bentonite | 32.099                              | 0.0546                                   | 6.7989                     | 1.66     |
| ABT-bent      | 188.6400                            | 0.1745                                   | 3.7002                     | 1.22     |
| CTAB-bent     | 94.1380                             | 0.1186                                   | 5.0389                     | 1.22     |
| GDU-bent      | 201.9000                            | 0.2387                                   | 4.7282                     | 1.22     |
| ABT-bent-lac  | 169.7300                            | 0.1736                                   | 4.0918                     | 1.22     |
| CTAB-bent-lac | 68.5710                             | 0.1025                                   | 5.9784                     | 1.22     |
| GDU-bent-lac  | 141.5000                            | 0.1484                                   | 4.1940                     | 1.22     |

**Table 4** Kinetics values for free and immobilized laccase

|               | Km (mM) | Vmax (mM.min-1) | Catalytic efficiency (CE) |
|---------------|---------|-----------------|---------------------------|
| Free laccase  | 0.022   | 0.047           | 2.184                     |
| GDU-bent-lac  | 0.077   | 0.075           | 0.970                     |
| CTAB-bent-lac | 0.113   | 0.030           | 0.261                     |
| ABT-bent-lac  | 0.032   | 0.020           | 0.618                     |

**Table 5** Parameters of Langmuir and Freundlich isotherms for protein adsorption onto two modified bentonite supports

| Models            | ABT-bentonite | CTAB-bentonite |
|-------------------|---------------|----------------|
| Values            |               |                |
| <b>Langmuir</b>   |               |                |
| $q_{\max}$ (mg/g) | 117.65        | 133.33         |
| $K_l$ (L/mg)      | 0.0035        | 0.133          |
| $R^2$             | 0.9989        | 0.9998         |
| <b>Freundlich</b> |               |                |
| $K_F$ (mg/g)      | 113.26        | 105.18         |
| $n$ (g/L)         | 13.17         | 5.9            |
| $R^2$             | 0.5159        | 0.9413         |
